# Supplementary material for: LRG1 is an adipokine that promotes insulin sensitivity and suppresses inflammation
Source: Research Square preprint supplement (doi:10.21203/rs.3.rs-656094/v1), 2021-07-12
Supplement: Supplementary file 2 [file 46eb393fe45e8edca1444535.docx]

**Supplementary Table 1. Primer sequences used for RT-qPCR analysis**

| **Gene** | **Forward Primer (5’ to 3’)** | **Reverse Primer (5’ to 3’)** |
| --- | --- | --- |
| *Fabp4* | ACACCGAGATTTCCTTCAAACTG | CCATCTAGGGTTATGATGCTCTTCA |
| *Pparg2* | GCATGGTGCCTTCGCTGA | TGGCATCTCTGTGTCAACCATG |
| *Adipoq* | GCACTGGCAAGTTCTACTGCAA | GTAGGTGAAGAGAACGGCCTTGT |
| *Prdm16* | CAGCACGGTGAAGCCATTC | GCGTGCATCCGCTTGTG |
| *Ucp1* | CTTTGCCTCACTCAGGATTGG | ACTGCCACACCTCCAGTCATT |
| *Lrg1* | ATCAAGGAAGCCTCCAGGATCT | CTCAGCCGACTGCAGTATCA |
| *Il1b* | GCAACTGTTCCTGAACTCAACT | ATCTTTTGGGGTCCGTCAACT |
| *Cxcl10* | GGATCCCTCTCGCAAGGA | ATCGTGGCAATGATCTCAACA |
| *Il6* | TAGTCCTTCCTACCCCAATTTCC | TTGGTCCTTAGCCACTCCTTC |
| *Nos2* | GTTCTCAGCCCAACAATACAAGA | GTGGACGGGTCGATGTCAC |
| *Rn18s* | CGATGCTCTTAGCTGAGTGT | GGTCCAAGAATTTCACCTCT |
